# Supplementary material for: Spatiotemporal analysis of pertussis in Hunan Province, China, 2009–2019
Source: HighWire-hosted journal article supplement (doi:10.1136/bmjopen-2021-055581), 2022-09-01
Supplement: bmjopen-2021-055581supp001_data_supplement.pdf [file bmjopen-2021-055581supp001_data_supplement.pdf]

## SUPPLEMENTARY MATERIAL

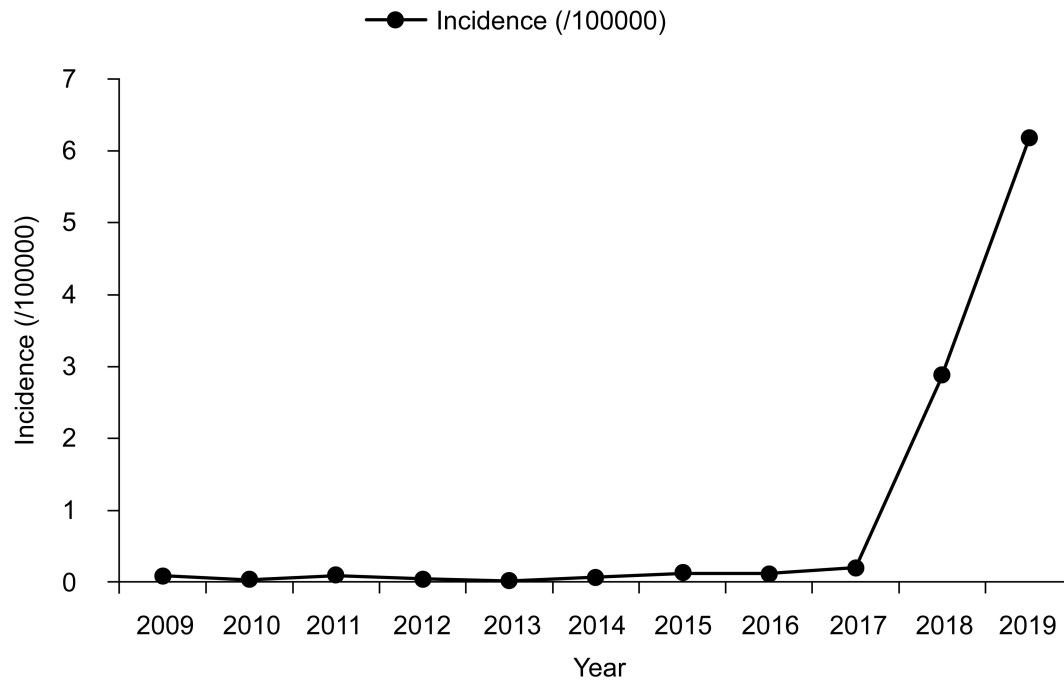

**Supplementary Figure 1.** Annual incidence rate of pertussis in Hunan Province, China, 2009–2019.

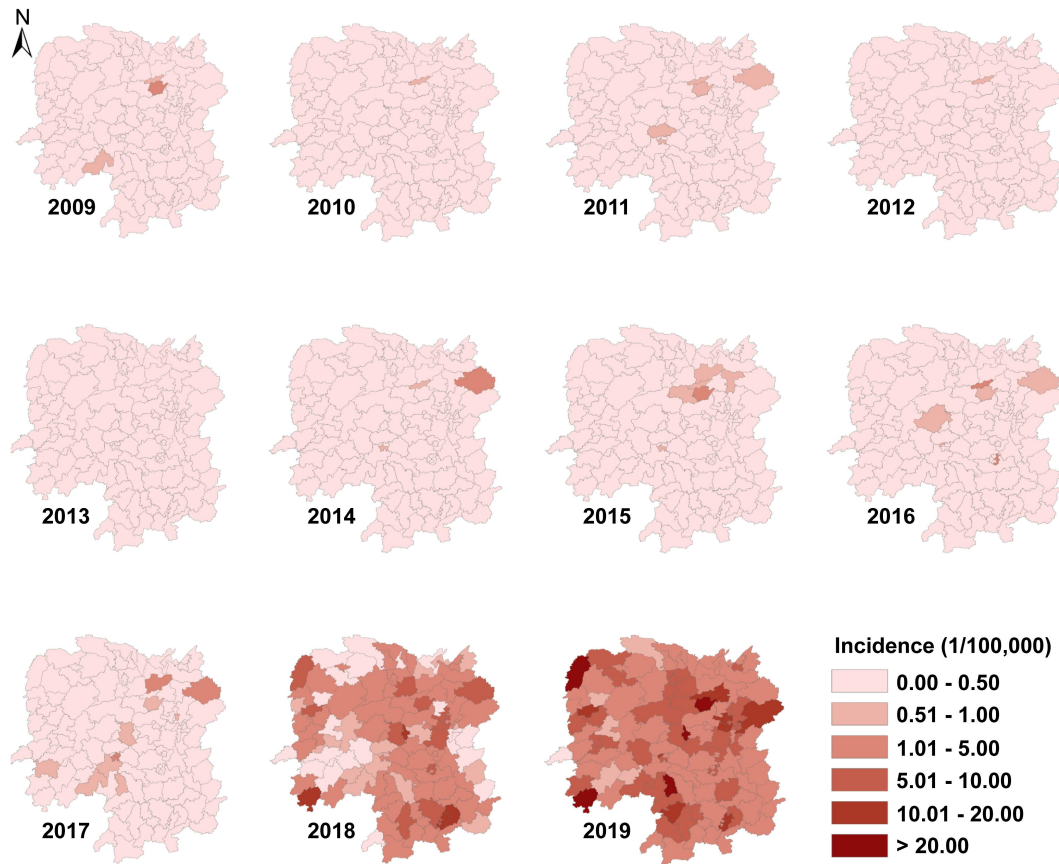

**Supplementary Figure 2.** Annual incidence of pertussis at county level in Hunan Province, China, 2009–2019.

**Supplementary Table 1.** Global spatial autocorrelation analysis of pertussis incidence in Hunan Province, China, 2009–2019.

| Year | Moran's <i>I</i> | Z-Score | <i>P</i> -Value |
|------|------------------|---------|-----------------|
| 2009 | 0.189            | 3.928   | <0.001          |
| 2010 | 0.341            | 7.021   | <0.001          |
| 2011 | 0.207            | 4.134   | <0.001          |
| 2012 | 0.122            | 2.860   | 0.004           |
| 2013 | 0.013            | 0.401   | 0.688           |
| 2014 | 0.058            | 1.317   | 0.188           |
| 2015 | 0.302            | 5.931   | <0.001          |
| 2016 | 0.016            | 0.501   | 0.617           |
| 2017 | 0.128            | 2.571   | 0.010           |
| 2018 | 0.198            | 3.866   | <0.001          |
| 2019 | 0.107            | 2.169   | 0.030           |

**Supplementary Table 2.** The clusters of pertussis cases detected by using the purely spatial scan statistics

| Cluster type     | Counties<br>(n) | Radius<br>(km) | Observed<br>cases | Expected<br>cases | <i>LLR</i> | <i>RR</i> | <i>P</i> |
|------------------|-----------------|----------------|-------------------|-------------------|------------|-----------|----------|
| Most likely      | 20              | 73.75          | 2,151             | 1,431.45          | 207.00     | 1.74      | <0.001   |
| Secondary        | 1               | 0              | 167               | 47.23             | 92.23      | 3.60      | <0.001   |
| 2nd<br>Secondary | 1               | 0              | 98                | 17.42             | 89.16      | 5.69      | <0.001   |
| 3rd<br>Secondary | 1               | 0              | 173               | 59.20             | 72.68      | 2.97      | <0.001   |
| 4th<br>Secondary | 2               | 24.93          | 212               | 90.80             | 59.66      | 2.38      | <0.001   |
| 5th<br>Secondary | 4               | 12.63          | 151               | 96.28             | 13.46      | 1.58      | <0.001   |
| 6th<br>Secondary | 13              | 102.83         | 318               | 245.60            | 10.16      | 1.31      | 0.003    |

LLR, larger log likelihood ratio; RR, relative risk

**Supplementary Table 3.** Clusters of pertussis cases detected by spatial-temporal scan statistics

| Cluster type  | Time frame      | Radius (km) | Cluster |     | Observed | Expected | LLR    | RR   | P      |
|---------------|-----------------|-------------|---------|-----|----------|----------|--------|------|--------|
|               |                 |             | areas   | (n) |          |          |        |      |        |
| Most likely   | 2019/03-2019/09 | 91.45       | 26      | 26  | 1422     | 531.76   | 574.97 | 3.12 | <0.001 |
| Secondary     | 2019/03-2019/10 | 0           | 1       | 1   | 129      | 20.32    | 130.60 | 6.45 | <0.001 |
| 2nd Secondary | 2019/04-2019/09 | 0           | 1       | 1   | 100      | 13.79    | 112.48 | 7.35 | <0.001 |
| 3rd Secondary | 2018/04-2019/08 | 24.93       | 2       | 2   | 190      | 69.54    | 71.59  | 2.78 | <0.001 |

LLR, larger log likelihood ratio; RR, relative risk
